# Supplementary material for: Effects of Daily Kelp (Laminaria japonica) Intake on Body Composition, Serum Lipid Levels, and Thyroid Hormone Levels in Healthy Japanese Adults: A Randomized, Double-Blind Study
Source: MDPI journal article supplement (doi:10.3390/md19070352), 2021-06-22
Supplement: s1 [file s1]

**Table S1.** Effects of boiled kelp powder on body weight, BMI, body fat percentage, visceral fat area, and blood pressure (mean±SE)

|                                      |        | Placebo(n=24) |           | 8-0W       | Test(n=24) |           | 8-0W       | p(8-0W) <sup>†</sup> |
|--------------------------------------|--------|---------------|-----------|------------|------------|-----------|------------|----------------------|
|                                      |        | 0             | 8         |            | 0          | 8         |            |                      |
| Body weight(kg)                      | male   | 80.9±1.8      | 81.3±1.8  | 0.39±0.48  | 79.0±1.0   | 78.1±5.3  | -0.89±0.46 | 0.065                |
|                                      | Female | 68.1±1.6      | 68.1±1.6  | 0.01±0.40  | 69.8±1.3   | 70.0±1.2  | 0.24±0.35  | 0.665                |
| BMI (kg/cm <sup>2</sup> )            | male   | 27.1±0.4      | 27.0±0.4  | 0.13±0.12  | 27.0±0.3   | 26.7±0.3  | -0.30±0.19 | 0.072                |
|                                      | Female | 27.4±0.5      | 27.4±0.4  | -0.01±0.16 | 27.3±0.40  | 27.4±0.4  | 0.11±0.13  | 0.587                |
| Body fat percentage (%)              | male   | 28.5±1.3      | 28.5±1.3  | -0.05±0.22 | 27.6±1.1   | 26.8±3.5  | -0.84±0.35 | 0.049                |
|                                      | Female | 39.2±1.1      | 38.5±1.1  | -0.66±0.39 | 38.1±1.0   | 37.3±1.1  | -0.72±0.40 | 0.992                |
| Visceral fat area (cm <sup>2</sup> ) | male   | 92.9±8.2      | 90.5±6.2  | -2.36±3.88 | 90.5±7.1   | 84.8±7.3  | -5.75±5.72 | 0.630                |
|                                      | Female | 73.4±7.2      | 71.5±6.1  | -1.90±5.10 | 74.4±7.3   | 72.4±8.5  | -2.00±3.90 | 0.991                |
| Systolic blood pressure (mmHg)       | male   | 125.5±3.3     | 121.7±4.3 | -3.4±3.3   | 125.3±3.6  | 121.1±3.1 | -4.2±2.9   | 0.921                |
|                                      | Female | 120.5±7.8     | 119.8±2.5 | -0.6±2.0   | 125.6±3.2  | 123.6±3.5 | -2.1±2.3   | 0.636                |
| Diastolic blood pressure (mmHg)      | male   | 81.0±2.4      | 75.9±3.6  | -5.1±2.4   | 81.7±2.9   | 74.8±1.8  | -6.9±1.5   | 0.777                |
|                                      | Female | 77.5±2.5      | 75.7±2.5  | -1.8±2.2   | 81.7±2.9   | 76.6±3.2  | -5.1±1.8   | 0.829                |

<sup>†</sup>p values for changes after placebo and test consumption (Welch's t-test or Wilcoxon rank sum test).
